# Supplementary material for: Fibrosis-4 index as a predictor for mortality in hospitalised patients with COVID-19: a retrospective multicentre cohort study
Source: PubMed Central journal article supplement — BMJ Open. 2020 Nov 12;10(11):e041989. doi: 10.1136/bmjopen-2020-041989 (PMC7662142; doi:10.1136/bmjopen-2020-041989), 2020-11-12
Supplement: bmjopen-2020-041989supp001.pdf [file bmjopen-2020-041989supp001.pdf]

Table S1. Risk factors with Fibrosis-4 score for mortality in patients with COVID-19 receiving respiratory support

| Variable                                                         | Univariate      | Multivariate analysis |                       |
|------------------------------------------------------------------|-----------------|-----------------------|-----------------------|
|                                                                  | <i>P</i> value* | <i>P</i> value*       | Hazard ratio (95% CI) |
| Male (yes/no)                                                    | 0.143           |                       |                       |
| Comorbidities (yes/no)                                           |                 |                       |                       |
| Hypertension                                                     | 0.392           |                       |                       |
| Diabetes                                                         | 0.001           | 0.008                 | 1.998 (1.202-3.321)   |
| Chronic obstructive pulmonary disease                            | 0.087           |                       |                       |
| Chronic kidney disease                                           | 0.841           |                       |                       |
| Chronic liver disease                                            | 0.226           |                       |                       |
| ACE inhibitor/ARB use (yes/no)                                   | 0.871           |                       |                       |
| Lymphocyte count, $\times 10^3/\mu\text{L}$                      | <0.001          | 0.003                 | 0.999 (0.998-1.000)   |
| C-reactive protein, mg/L                                         | 0.584           |                       |                       |
| Total bilirubin, mg/dL                                           | 0.831           |                       |                       |
| Alkaline phosphatase, U/L                                        | 0.725           |                       |                       |
| Gamma glutamyl transferase, U/L                                  | 0.263           |                       |                       |
| Serum albumin, g/dL                                              | 0.773           |                       |                       |
| Prothrombin time, INR                                            | 0.444           |                       |                       |
| Estimated glomerular filtration rate, mL/min/1.73 m <sup>2</sup> | 0.002           |                       |                       |
| SIRS on admission (yes/no)                                       | <0.001          |                       |                       |
| Fibrosis-4 score                                                 | <0.001          | <0.001                | 1.115 (1.069-1.163)   |

\*Calculated by Cox proportional hazards regression test

ACE, angiotensin converting enzyme; ARB, angiotensin II receptor blocker; INR, international normalized ratio, SIRS, systemic inflammatory response syndrome.

Table S2. Adjusted hazard ratio of high Fibrosis-4 index for mortality in patients with COVID-19 receiving respiratory support

|                                                    | Death            |                 |
|----------------------------------------------------|------------------|-----------------|
|                                                    | HR (95% CI)      | <i>P</i> -value |
| High Fibrosis-4 index ( $\geq 4.95$ ) (yes vs. no) |                  |                 |
| Unadjusted                                         | 3.93 (2.44-6.33) | <0.001          |
| Model 1                                            | 3.01 (1.84-4.93) | <0.001          |
| Model 2                                            | 3.02 (1.84-4.96) | <0.001          |
| Model 3                                            | 2.80 (1.64-4.65) | <0.001          |

HR, hazard ratio; CI, confidential interval

Model 1 was adjusted for age, gender.

Model 2 was adjusted for chronic liver disease, diabetes, hypertension, chronic kidney disease, and chronic obstructive pulmonary disease inclusive of model 1.

Model 3 was adjusted for lymphocyte count, C-reactive protein, and presence of systemic inflammatory response syndrome inclusive of model 2.

Figure S1. Survival of the patients with COVID-19 receiving respiratory support as the number of risk factors

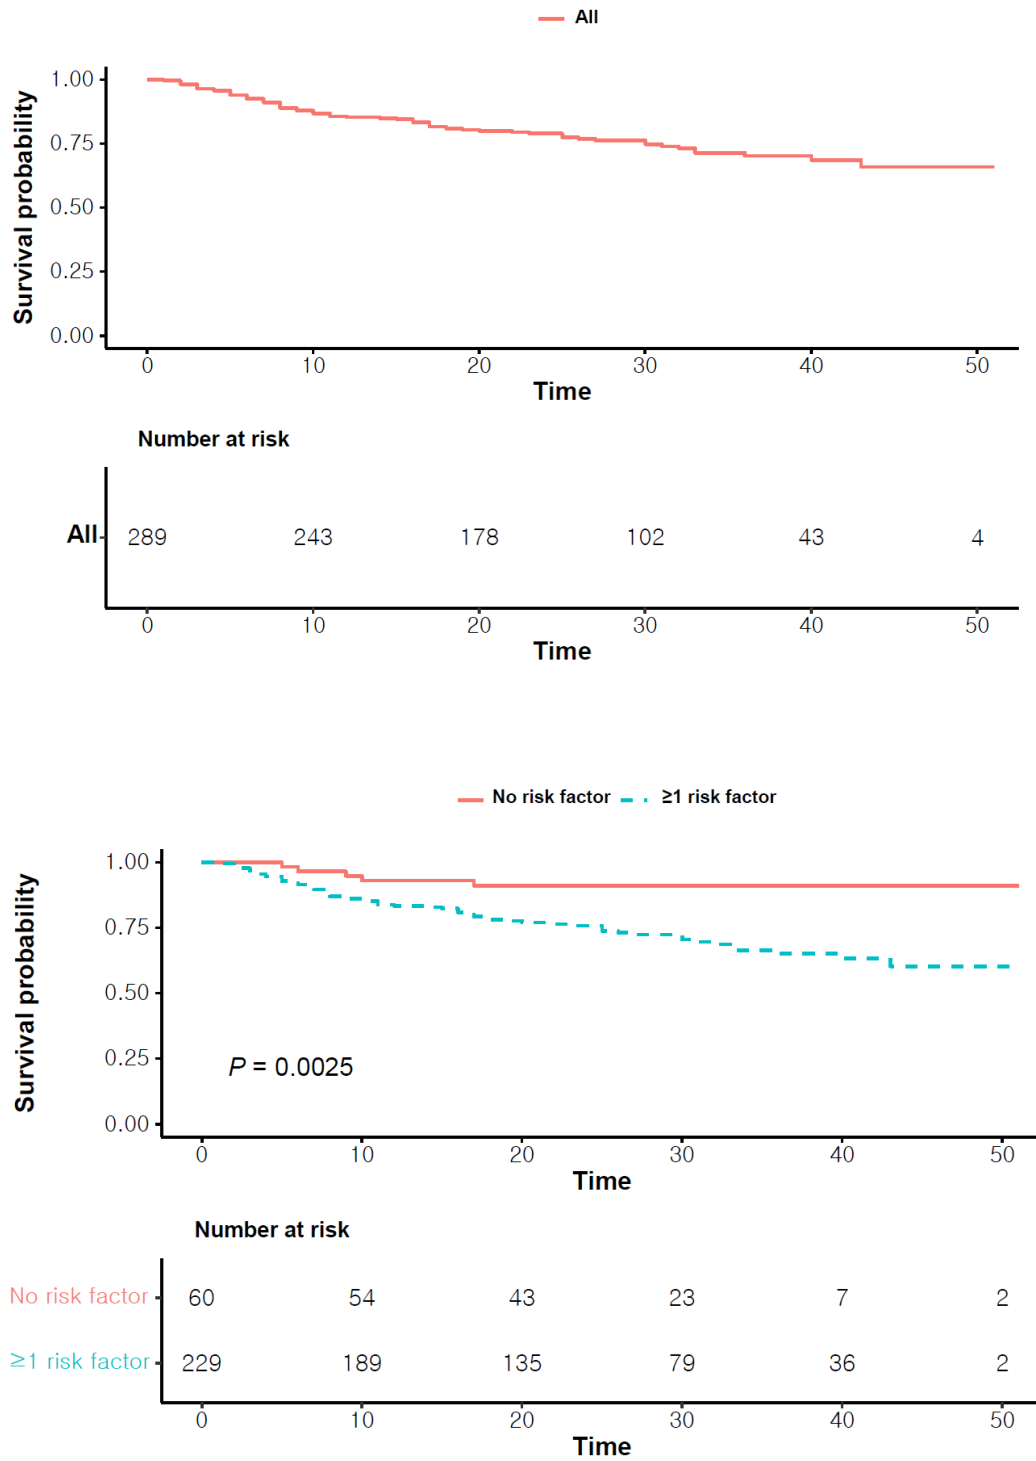

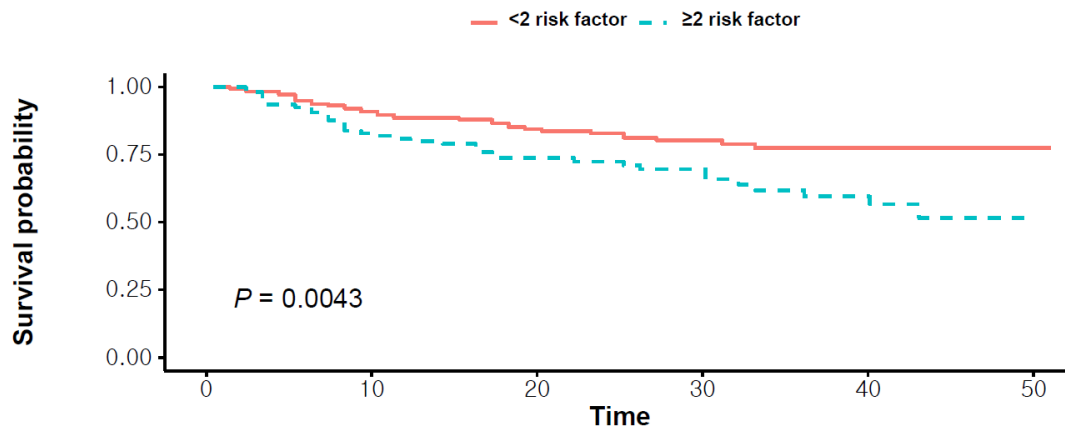

**Number at risk**

|                 | 0   | 10  | 20  | 30 | 40 | 50 |
|-----------------|-----|-----|-----|----|----|----|
| < 2 risk factor | 181 | 157 | 116 | 65 | 22 | 3  |
| ≥2 risk factor  | 108 | 86  | 62  | 37 | 21 | 1  |

Time

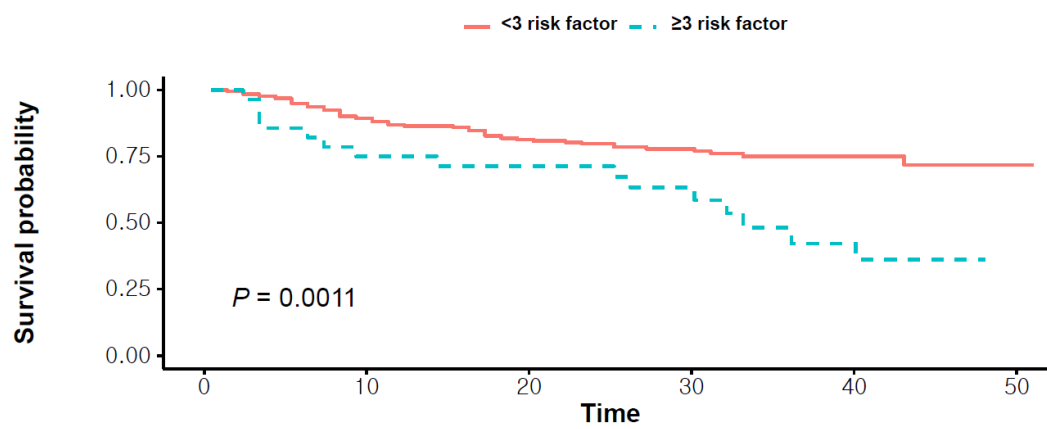

**Number at risk**

|                 | 0   | 10  | 20  | 30 | 40 | 50 |
|-----------------|-----|-----|-----|----|----|----|
| < 2 risk factor | 261 | 222 | 160 | 89 | 36 | 4  |
| ≥2 risk factor  | 28  | 21  | 18  | 13 | 7  | 0  |

Time

Figure S2. Survival of the entire group of patients with COVID-19 as the number of risk factors

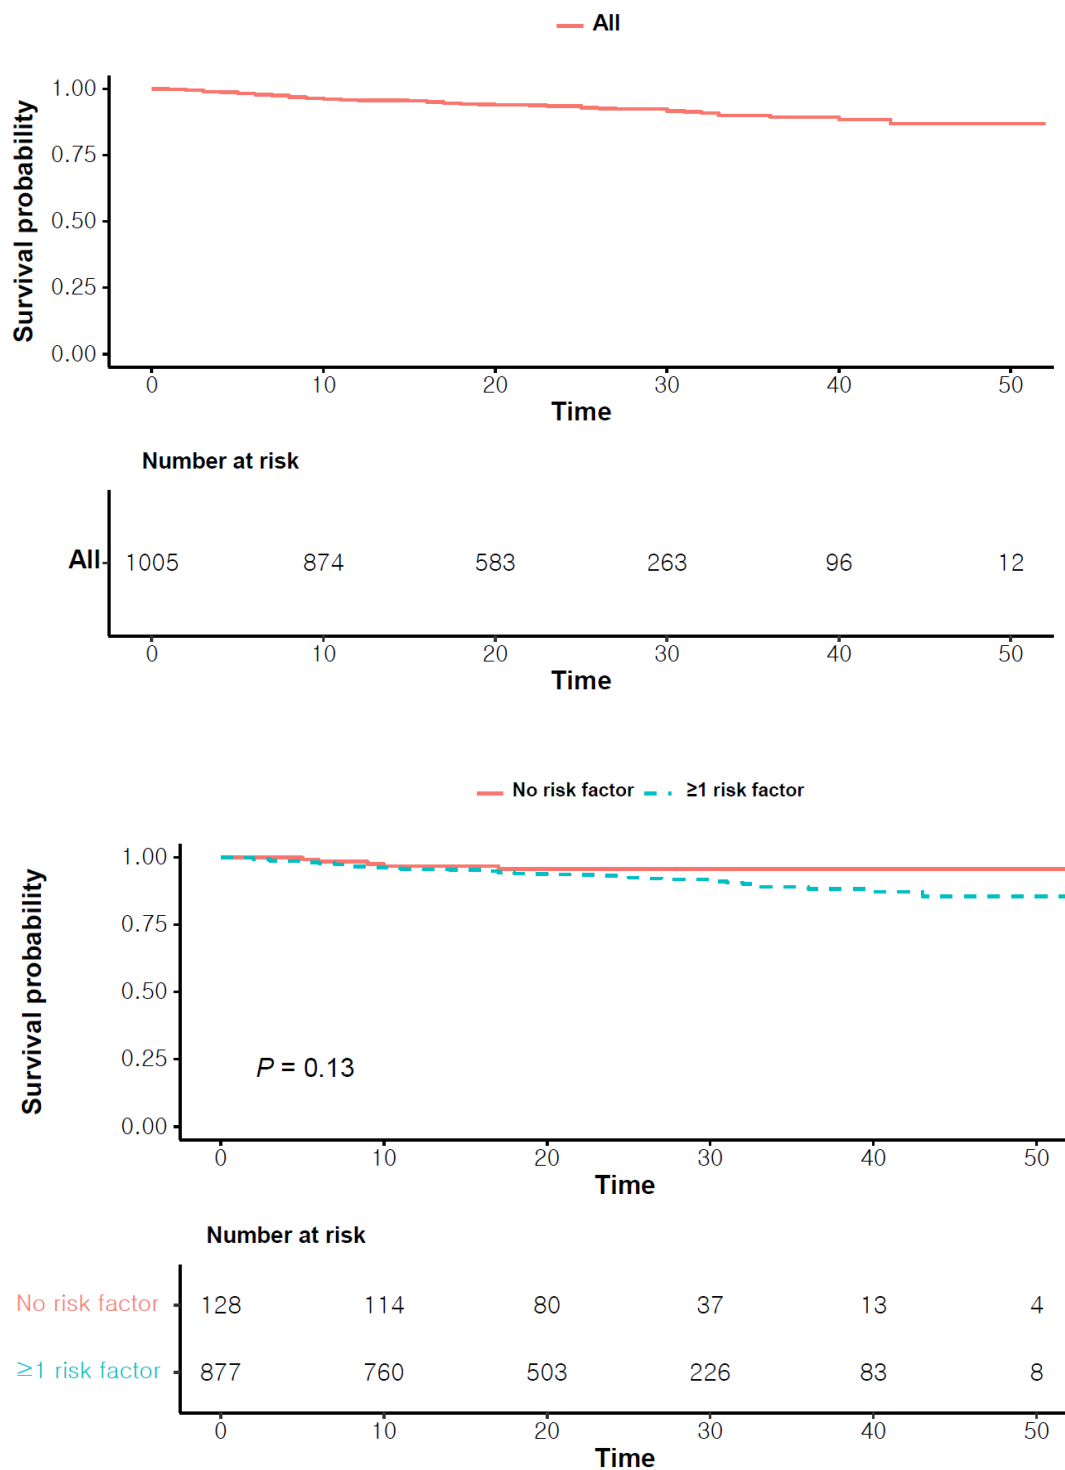

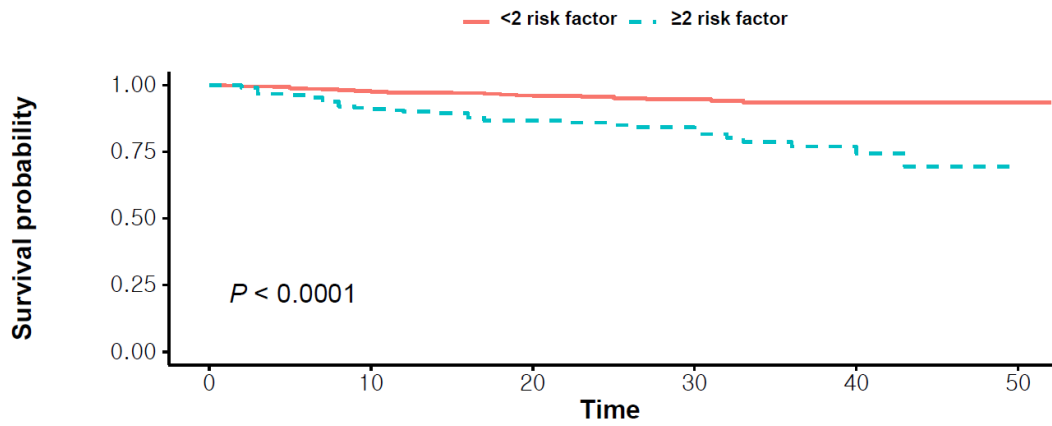

**Number at risk**

|                 |     |     |     |     |    |    |
|-----------------|-----|-----|-----|-----|----|----|
| < 2 risk factor | 787 | 684 | 448 | 198 | 66 | 11 |
| ≥2 risk factor  | 218 | 190 | 135 | 65  | 30 | 1  |

**Time**

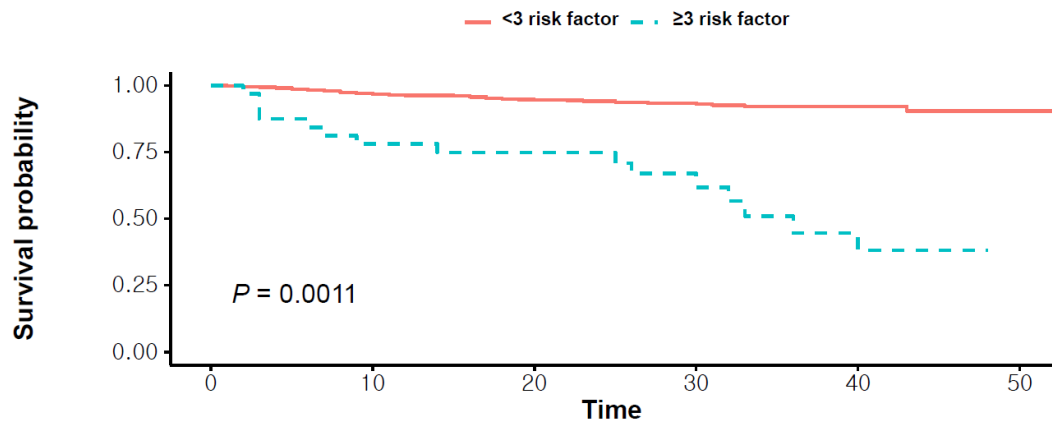

**Number at risk**

|                 |     |     |     |     |    |    |
|-----------------|-----|-----|-----|-----|----|----|
| < 2 risk factor | 973 | 849 | 562 | 250 | 89 | 12 |
| ≥2 risk factor  | 32  | 25  | 21  | 13  | 7  | 0  |

**Time**
